# Supplementary material
Source: publisher site journal article supplement (https://www.spandidos-publications.com/7646/downloadSupplementary)
Supplement: Supplementary file 1 [file downloadSupplementary]

Table SI. Amino acid detection mass spectrometry parameters.

| Amino acid | Q1 mass | Q3 mass | Entrance voltage (V) | Collision cell lens 2 (V) | Collision energy (V) |
|------------|---------|---------|----------------------|---------------------------|----------------------|
| Gly        | 76.0    | 30.0    | 15                   | -16                       | -20                  |
| Gly IS     | 78.0    | 32.0    | 15                   | -16                       | -20                  |
| Ala        | 90.1    | 44.0    | 20                   | -20                       | -16                  |
| Ala IS     | 93.1    | 47.1    | 20                   | -20                       | -16                  |
| Pro        | 116.1   | 70.1    | 20                   | -30                       | -24                  |
| Pro IS     | 121.1   | 74.1    | 20                   | -30                       | -24                  |
| Val        | 118.1   | 72.1    | 20                   | -24                       | -16                  |
| Val IS     | 124.1   | 77.1    | 20                   | -24                       | -16                  |
| Leu        | 132.1   | 86.1    | 20                   | -27                       | -16                  |
| Leu IS     | 135.1   | 89.1    | 20                   | -27                       | -16                  |
| Orn        | 133.1   | 70.1    | 20                   | -31                       | -25                  |
| Orn IS     | 139.1   | 76.1    | 20                   | -31                       | -25                  |
| Gln        | 147.1   | 84.0    | 20                   | -36                       | -23                  |
| Glu        | 148.1   | 84.0    | 17                   | -33                       | -24                  |
| Gln IS     | 152.1   | 88.1    | 20                   | -36                       | -23                  |
| Met        | 150.1   | 104.1   | 20                   | -28                       | -15                  |
| Met IS     | 153.1   | 107.1   | 20                   | -28                       | -15                  |
| Phe        | 166.1   | 120.1   | 20                   | -35                       | -20                  |
| Phe IS     | 172.1   | 126.1   | 20                   | -35                       | -20                  |
| Arg        | 175.1   | 70.1    | 28                   | -39                       | -32                  |
| Arg IS     | 180.1   | 75.1    | 28                   | -39                       | -32                  |
| Cit        | 176.1   | 113.1   | 20                   | -40                       | -22                  |
| Cit IS     | 178.1   | 115.1   | 20                   | -40                       | -22                  |
| Tyr        | 182.1   | 136.1   | 20                   | -40                       | -18                  |
| Tyr IS     | 188.1   | 142.1   | 20                   | -40                       | -18                  |
| HArg       | 189.1   | 84.1    | 15                   | -44                       | -30                  |
| Lys        | 147.5   | 130.0   | 13                   | -21                       | -13                  |

IS, isotope internal standard; Harg, homoarginine.
